# Supplementary material for: Genome-wide mapping using new AFLP markers to explore intraspecific variation among pathogenic Sporothrix species
Source: PubMed Central journal article supplement (PMC7329091; doi:10.1371/journal.pntd.0008330), 2020-07-01
Supplement: pntd.0008330.s001.pdf [file pntd.0008330.s001.pdf]

**S1 Table.** Diversity of AFLP fragments (50-500 bp) based on *in silico* characterization of *Sporothrix* spp. genomes for 256 selective combinations.

| Genome                     | AWTV01 |       | AWEQ01 |       | AXCR01 |       | NTMI01 |       | PGUU01 |       | LVYW01 |       | LVYX01 |       | JNEX02 |       | AZHD01 |       |
|----------------------------|--------|-------|--------|-------|--------|-------|--------|-------|--------|-------|--------|-------|--------|-------|--------|-------|--------|-------|
|                            | AFLP   | ISIF  | AFLP   | ISIF  | AFLP   | ISIF  | AFLP   | ISIF  | AFLP   | ISIF  | AFLP   | ISIF  | AFLP   | ISIF  | AFLP   | ISIF  | AFLP   | AFLP  |
| Minimum n. of AFLP markers | 0      | 0     | 2      | 1     | 2      | 1     | 3      | 3     | 2      | 3     | 1      | 3     | 2      | 3     | 1      | 2     | 1      | 3     |
| Median n. of AFLP markers  | 11     | 12    | 10     | 12    | 10     | 12    | 11     | 12    | 11     | 12    | 12     | 13    | 12     | 13    | 14     | 15    | 11     | 13    |
| Maximum n. of AFLP markers | 34     | 37    | 36     | 38    | 38     | 39    | 35     | 40    | 35     | 41    | 43     | 46    | 39     | 43    | 56     | 62    | 36     | 42    |
| 25% %tile                  | 8      | 9     | 7      | 8     | 7      | 8     | 8      | 9     | 8      | 9     | 9      | 10    | 9      | 10    | 10     | 11    | 8      | 9     |
| 75% %tile                  | 14     | 16    | 14     | 15    | 13     | 15,75 | 15     | 17    | 15     | 17    | 15     | 17    | 15     | 17    | 19     | 20    | 14     | 17    |
| 90% %tile                  | 18     | 21    | 18     | 19    | 18,30  | 20    | 19     | 21,30 | 19     | 21    | 20     | 22    | 20,30  | 23    | 25     | 28,30 | 19     | 21,30 |
| Mean                       | 11,55  | 12,90 | 11,15  | 12,41 | 11,04  | 12,53 | 12,01  | 13,44 | 12,02  | 13,33 | 12,61  | 13,87 | 12,73  | 14,01 | 15,27  | 17,16 | 11,73  | 13,71 |
| Std. Deviation             | 5,403  | 6,042 | 5,462  | 5,799 | 5,394  | 5,830 | 5,462  | 6,015 | 5,626  | 6,134 | 5,745  | 6,362 | 5,715  | 6,239 | 8,398  | 9,252 | 5,801  | 6,142 |

AFLP: AFLPinsilico software; ISIF: In Silico Fingerprinting software.
