# Supplementary material for: Genome-wide mapping using new AFLP markers to explore intraspecific variation among pathogenic Sporothrix species
Source: PubMed Central journal article supplement (PMC7329091; doi:10.1371/journal.pntd.0008330), 2020-07-01
Supplement: pntd.0008330.s002.pdf [file pntd.0008330.s002.pdf]

**S2 Table.** Cluster similarities among all the combinations evaluated.

| Cluster                | N. of samples | Combination 1 |                  | Combination 2 |                  | Combination 3 |                  | Combination 4 |                  | Combination 5 |                  | Combination 6 |                  |
|------------------------|---------------|---------------|------------------|---------------|------------------|---------------|------------------|---------------|------------------|---------------|------------------|---------------|------------------|
|                        |               | CC            | Similarity level | CC            | Similarity level | CC            | Similarity level | CC            | Similarity level | CC            | Similarity level | CC            | Similarity level |
| <i>S. brasiliensis</i> | 9             | 98            | 44.14% ± 1.59%   | 94            | 50.87% ± 2.15%   | 93            | 50.42% ± 1.79%   | 93            | 45.47% ± 1.71%   | 93            | 51.96% ± 2.83%   | 98            | 37.53% ± 4.06%   |
| <i>S. schenckii</i>    | 8             | 86            | 38.81% ± 2.58%   | 91            | 34.86% ± 0.81%   | 93            | 37.12% ± 3.63%   | 97            | 45.08% ± 3.33%   | 95            | 52.56% ± 1.43%   | 93            | 27.44% ± 2.55%   |
| <i>S. globosa</i>      | 6             | 89            | 66.58% ± 1.98%   | 89            | 63.60% ± 0.81%   | 93            | 74.38% ± 1.82%   | 95            | 65.04% ± 1.19%   | 81            | 64.42% ± 2.35%   | 91            | 42.79% ± 1.61%   |
| <i>S. mexicana</i>     | 2             | -             | 81.87% ± 0.00%   | -             | 95.68% ± 0.00%   | -             | 92.54% ± 0.00%   | -             | 98.44% ± 0.00%   | -             | 98.20% ± 0.00%   | -             | 89.80% ± 0.00%   |
| <i>S. pallida</i>      | 1             | -             | -                | -             | -                | -             | -                | -             | -                | -             | -                | -             | -                |
| <i>S. chilensis</i>    | 1             | -             | -                | -             | -                | -             | -                | -             | -                | -             | -                | -             | -                |
| Overall                | 27            | 96            | 24.70% ± 2.56%   | 97            | 22.81% ± 3.29%   | 97            | 21.83% ± 4.14%   | 96            | 23.37% ± 2.94%   | 97            | 24.83% ± 4.19%   | 96            | 17.94% ± 3.25%   |

CC: Cophenetic Correlation Coefficient. The cophenetic correlation is a measure of how faithfully a dendrogram preserves the pairwise distances between the original unmodeled data points.
